# Supplementary material for: Variation in the diversity and richness of parasitoid wasps based on sampling effort
Source: PeerJ. 2018 Apr 5;6:e4642. doi: 10.7717/peerj.4642 (PMC5889912; doi:10.7717/peerj.4642)
Supplement: Supplemental Information 2 [file peerj-06-4642-s002.xlsx]

## Sheet: Sampling Data
	1	2	3	4	5	6	7	8	9	10	11	12	13	14	15	16	17	18	19	20	21	22	23	24	25	26	27	28	29	30	31	32	33	34	35	36	37	38	39	40	41	42	43	44	45	46	47	48	49
Site	Huapai	Huapai	Huapai	Huapai	Huapai	Huapai	Huapai	Huapai	Huapai	Huapai	Huapai	Huapai	Huapai	Huapai	Huapai	Huapai	Huapai	Huapai	Huapai	Huapai	Oratia	Oratia	Oratia	Oratia	Oratia	Oratia	Oratia	Oratia	Oratia	Oratia	Oratia	Oratia	Oratia	Oratia	Oratia	Oratia	Oratia	Oratia	Oratia	Oratia	Huapai	Huapai	Huapai	Huapai	Huapai	Huapai	Huapai	Huapai	Huapai
Trap#	H1	H2	H3	H4	H5	H6	H7	H8	H9	H10	H11	H12	H13	H14	H15	H16	H17	H18	H19	H20	O1	O2	O3	O4	O5	O6	O7	O8	O9	O10	O11	O12	O13	O14	O15	O16	O17	O18	O19	O20	H1	H2	H3	H4	H5	H6	H7	H8	H9
Month	Dec	Jan	Feb	Mar	Apr	May	Jun	Jul	Aug	Sep	Oct	Nov	Dec	Jan	Feb	Mar	Apr	May	Jun	Jul	Aug	Sep	Oct	Nov	Dec	Jan	Feb	Mar	Apr	May	Jun	Jul	Aug	Sep	Oct	Nov	Dec	Jan	Feb	Mar	Jan	Jan	Jan	Jan	Jan	Jan	Jan	Jan	Jan
"Heart-head"																1					1																			1	2	1
Aclastus sp.1																																									1
Aclastus sp.2
Aclosmation sp.1
Aclosmation sp.10															1
Aclosmation sp.11	1
Aclosmation sp.2																														1
Aclosmation sp.3															1
Aclosmation sp.4																1																		1
Aclosmation sp.5
Aclosmation sp.6
Aclosmation sp.7
Aclosmation sp.8																1
Aclosmation sp.9		1
Aucklandella sp.1	3									1			1			4	1																								1
Aucklandella sp.10
Aucklandella sp.11
Aucklandella sp.12
Aucklandella sp.13
Aucklandella sp.14
Aucklandella sp.15											1																						1	1							3						1
Aucklandella sp.2	1															4	1																		1
Aucklandella sp.3
Aucklandella sp.4																																						1
Aucklandella sp.5
Aucklandella sp.6
Aucklandella sp.7
Aucklandella sp.8															2	1
Aucklandella sp.9															1
Campoletis sp.1
Campoplex sp.1		2																															8		2					1	1						1
Campoplex sp.2
Campoplex sp.3															1		1			1
Campoplex sp.4																														1
Campoplex sp.5																		1
Campoplex sp.6																																										1					1		1
Campoplex sp.7													1
Campoplex sp.8																																							1
Carria fortipes																																										1
Casinaria sp.1
Degithina sp.1																																	1														1
Degithina sp.2																																	7
Degithina sp.3
Diadegma sp.1
Diadegma sp.2																			1
Diadegma sp.3																																									1
Diadegma sp.4
Dusona destructor
Genus G -Tersilochinae
Genus H -Tersilochinae																			1
Helictes
Lissonota albopicta																																		1
Lissonotoa fulva
Megastylus sp.1			3					3	1		2	1				2	1	1		5
Megastylus sp.2																																			1			2
Megastylus sp.3												1
Mesochorus sp.1												1
Mesochorus sp.2
Odontoclastus				1
Sciron glaber																																									1
Xanthocryptus novozealandicus		1
[truncated: 71 more columns]
